# Supplementary material for: Redundancy and the Evolution of Cis-Regulatory Element Multiplicity
Source: PubMed Central journal article supplement (PMC2900288; doi:10.1371/journal.pcbi.1000848), 2010-07-08

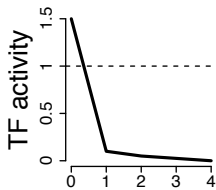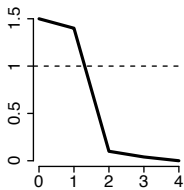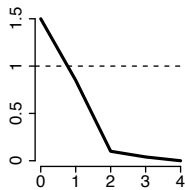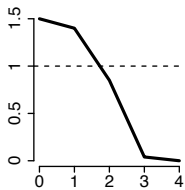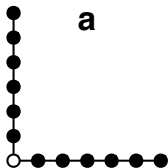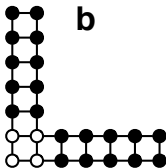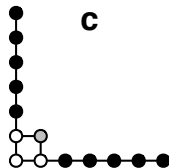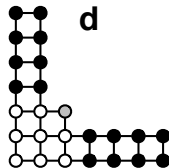

Supplement: pcbi.1000848.s002.pdf [file pcbi.1000848.s002.pdf]
