# Supplementary material for: Redundancy and the Evolution of Cis-Regulatory Element Multiplicity
Source: PubMed Central journal article supplement (PMC2900288; doi:10.1371/journal.pcbi.1000848), 2010-07-08
Supplement: pcbi.1000848.s006.pdf [file pcbi.1000848.s006.pdf]

**Table S1.** Binding site PWM models used in our study. Values are the length ( $8.7 \pm 2.6$  bp, mean  $\pm$  s.d.), GC content ( $0.53 \pm 0.19$ ) and mean information content ( $I$ ) per position ( $1.33 \pm 0.29$ ) of each PWM (after processing as described in Protocol S1). The value of  $I$  can vary between 0 and 2, and is a measure of the energy contribution of a position to TF binding. Each PWM is summarized by its canonical sequence: “.” indicates a position with  $I = 0$ ; “[ / ]” indicates bases with the same weight at a given position. Letters in parentheses after TF names indicate the study from which we took the PWM data: B, Badis *et al.* (2008); H, Harbison *et al.* (2004); M, MacIsaac *et al.* (2006); Zhu *et al.* (2009).

| TF (Study) | Length | GC content | Information | Canonical sequence     |
|------------|--------|------------|-------------|------------------------|
| ABF1 (B)   | 14     | 0.4965     | 0.810       | TCGTATAAAGTGAT         |
| ABF1 (H)   | 12     | 0.4035     | 0.745       | TCACTATATACG           |
| ABF1 (M)   | 13     | 0.4878     | 1.016       | ATCACTATGCACG          |
| ABF2 (B)   | 6      | 0.3571     | 1.772       | TCTAGA                 |
| ACE2 (B)   | 7      | 0.7096     | 1.362       | ACCAGCA                |
| ACE2 (M)   | 8      | 0.6029     | 0.876       | AACCAGCA               |
| ADR1 (H)   | 5      | 0.7856     | 1.366       | GG[A/G]G[G/T]          |
| AFT1 (Z)   | 9      | 0.5536     | 1.295       | ATTGCACCC              |
| AFT2 (B)   | 8      | 0.7140     | 1.437       | CACACCCC               |
| AFT2 (H)   | 6      | 0.7342     | 1.085       | GGGTGC                 |
| AFT2 (M)   | 7      | 0.7480     | 1.217       | GGCACCC                |
| ARG80 (M)  | 6      | 0.5650     | 1.518       | AGACGC                 |
| ARG81 (M)  | 8      | 0.4725     | 1.370       | GTGACTCA               |
| ARO80 (M)  | 22     | 0.6293     | 1.417       | CGAGGGTAGCCGCGAGTTGCCG |
| ARO80 (Z)  | 8      | 0.5990     | 1.202       | CTCGGCAA               |
| ARR1 (H)   | 7      | 0.1601     | 1.719       | TTACTAA                |
| ARR1 (M)   | 8      | 0.2780     | 1.015       | ACTTGAAT               |
| ASG1 (B)   | 6      | 0.6713     | 1.479       | CCGGAA                 |
| ASG1 (Z)   | 15     | 0.7371     | 0.851       | CCGGCCGAGTTCCGG        |
| ASH1 (H)   | 6      | 0.4206     | 1.573       | [C/T]TGACT             |
| ASH1 (M)   | 10     | 0.6674     | 1.025       | CCGGATCGGG             |
| AZF1 (B)   | 7      | 0.2411     | 1.520       | AAAAGAA                |
| AZF1 (H)   | 15     | 0.2743     | 0.969       | TTTTTCTTTTTCTGT        |
| AZF1 (M)   | 18     | 0.4340     | 0.810       | TTTTTCTTTTCCTGTGTC     |
| BAS1 (H)   | 6      | 0.4970     | 1.741       | TGACTC                 |
| BAS1 (M)   | 7      | 0.5390     | 1.375       | TGACTCG                |

Continued on next page

| TF (Study) | Length | GC content | Information | Canonical sequence  |
|------------|--------|------------|-------------|---------------------|
| BAS1 (Z)   | 9      | 0.6012     | 1.394       | CCAGAGTCA           |
| CAD1 (H)   | 9      | 0.2965     | 1.328       | TTAGTAAGC           |
| CAD1 (M)   | 10     | 0.3259     | 1.161       | GCTTACTAAT          |
| CAT8 (B)   | 5      | 0.8647     | 1.706       | CCGGA               |
| CBF1 (B)   | 8      | 0.5972     | 1.565       | GCACGTGA            |
| CBF1 (M)   | 8      | 0.6239     | 1.627       | GTCACGTG            |
| CBF1 (Z)   | 10     | 0.6033     | 1.112       | GTCACGTGAC          |
| CEP3 (B)   | 7      | 0.5263     | 1.652       | CTCGGAA             |
| CEP3 (Z)   | 8      | 0.4902     | 1.207       | TTCGGAAA            |
| CHA4 (B)   | 8      | 0.7500     | 1.399       | GGCGGAGA            |
| CHA4 (M)   | 8      | 0.5897     | 1.201       | GCGATGAG            |
| CHA4 (Z)   | 9      | 0.6319     | 1.199       | ATCTCCGCC           |
| CIN5 (H)   | 8      | 0.2178     | 1.152       | TTACGTAA            |
| CIN5 (M)   | 9      | 0.3193     | 0.978       | CTTACGTAA           |
| CRZ1 (B)   | 9      | 0.6821     | 0.917       | CTAAGCCAC           |
| CRZ1 (M)   | 7      | 0.7066     | 1.611       | GAGGCTG             |
| CST6 (B)   | 8      | 0.4605     | 1.419       | ATGACGTA            |
| CST6 (M)   | 6      | 0.3405     | 1.488       | GCATTT              |
| CUP9 (B)   | 8      | 0.3974     | 1.292       | TGACACAT            |
| DAL80 (B)  | 7      | 0.3849     | 1.567       | CGATAAG             |
| DAL81 (H)  | 19     | 0.6253     | 1.721       | AAAAGCCGCGGGCGGGATT |
| DAL82 (B)  | 9      | 0.5643     | 1.043       | AATGTGCGC           |
| DAL82 (H)  | 7      | 0.3427     | 1.445       | GATAAGA             |
| DAL82 (M)  | 9      | 0.4414     | 0.984       | AAAGATGCG           |
| DIG1 (M)   | 12     | 0.3952     | 0.663       | AAATATGAAACA        |
| DOT6 (B)   | 5      | 0.5050     | 1.619       | CGATG               |
| ECM22 (B)  | 7      | 0.6429     | 1.331       | CTCCGGA             |
| ECM22 (M)  | 7      | 0.2973     | 1.740       | GTATAAG             |
| ECM22 (Z)  | 12     | 0.7252     | 1.033       | CGGGTGGCCGGA        |
| ECM23 (B)  | 6      | 0.3913     | 1.236       | AGATCT              |
| FHL1 (Z)   | 8      | 0.5438     | 1.326       | GACGCAA             |
| FKH2 (B)   | 7      | 0.2679     | 1.922       | GTAAACA             |
| FKH2 (H)   | 11     | 0.2606     | 0.986       | AAAAGTAAACA         |
| FKH2 (Z)   | 8      | 0.2242     | 1.591       | GTAAACA             |

Continued on next page

| TF (Study) | Length | GC content | Information | Canonical sequence   |
|------------|--------|------------|-------------|----------------------|
| FZF1 (B)   | 6      | 0.3333     | 2.000       | CTATCA               |
| GAL4 (H)   | 17     | 0.5744     | 0.431       | CGGAAAAATATACTCCG    |
| GAL4 (M)   | 17     | 0.7258     | 0.967       | CGGAGGACAGTGCCCCG    |
| GAL4 (Z)   | 19     | 0.6601     | 0.692       | TCGGG . . . . . CCGA |
| GAT1 (H)   | 7      | 0.3158     | 1.552       | AGATAAG              |
| GAT1 (Z)   | 8      | 0.4218     | 1.498       | CCTTATCG             |
| GAT3 (B)   | 7      | 0.4056     | 1.046       | AGATCTA              |
| GAT3 (M)   | 8      | 0.2771     | 1.371       | ATAACATG             |
| GAT4 (Z)   | 8      | 0.3227     | 1.478       | TAGATCTA             |
| GCN4 (M)   | 8      | 0.4194     | 1.337       | ATGACTCA             |
| GCN4 (Z)   | 7      | 0.4203     | 1.609       | TGAGTCA              |
| GCR1 (H)   | 9      | 0.6585     | 1.622       | GGCTTCC[A/T]C        |
| GCR1 (M)   | 8      | 0.6821     | 1.474       | GGGCTTCC             |
| GCR2 (M)   | 7      | 0.5798     | 1.369       | GCTTCCA              |
| GIS1 (B)   | 7      | 0.6151     | 1.403       | CCCCTAA              |
| GLN3 (B)   | 5      | 0.2543     | 1.562       | GATAA                |
| GLN3 (H)   | 9      | 0.3223     | 1.129       | GATAAGATA            |
| GLN3 (M)   | 8      | 0.4293     | 0.980       | AGATAAGA             |
| GLN3 (Z)   | 13     | 0.3963     | 1.005       | TTAGGCCTTATCA        |
| GSM1 (Z)   | 9      | 0.5997     | 1.274       | AAACTCCGG            |
| GTS1 (M)   | 6      | 0.3558     | 1.527       | TACCAA               |
| GZF3 (H)   | 6      | 0.3416     | 1.720       | GATAAG               |
| GZF3 (Z)   | 8      | 0.3786     | 1.598       | CTGATAAG             |
| HAC1 (B)   | 7      | 0.5617     | 1.642       | GACACGT              |
| HAC1 (H)   | 11     | 0.6729     | 1.639       | G[A/C]CAGCGTGTC      |
| HAC1 (M)   | 10     | 0.5089     | 1.541       | AGGACACGTA           |
| HAL9 (B)   | 5      | 0.6721     | 1.713       | CGGAA                |
| HAP1 (H)   | 11     | 0.5372     | 1.086       | GGAAATATCGG          |
| HAP1 (M)   | 10     | 0.5625     | 0.807       | CGATAACGCC           |
| HAP2 (H)   | 5      | 0.4048     | 1.721       | CCAAT                |
| HAP2 (M)   | 8      | 0.4946     | 1.143       | CCAATGAG             |
| HAP4 (H)   | 9      | 0.4485     | 0.873       | GACCAATCA            |
| HAP4 (M)   | 8      | 0.4460     | 1.380       | CCAATCAG             |
| HCM1 (B)   | 8      | 0.2595     | 1.112       | ATAAACA              |

Continued on next page

| TF (Study)    | Length | GC content | Information | Canonical sequence |
|---------------|--------|------------|-------------|--------------------|
| HMRA2 (B)     | 8      | 0.2991     | 1.341       | CATGTAAT           |
| HSF1 (B)      | 8      | 0.3984     | 1.272       | ATGGAACA           |
| HSF1 (H)      | 13     | 0.3715     | 0.704       | TTCTATAACATTC      |
| IME1 (M)      | 8      | 0.8579     | 1.672       | CCGCCGAG           |
| INO2 (H)      | 7      | 0.5757     | 1.325       | CACATGC            |
| INO2 (M)      | 9      | 0.4971     | 1.354       | GCATGTGAA          |
| INO4 (H)      | 8      | 0.4133     | 1.319       | CATGTGAA           |
| IXR1 (M)      | 15     | 0.6214     | 1.380       | AAGCCGGAAGCGGGG    |
| LEU3 (B)      | 10     | 0.7536     | 1.224       | CCGTTACCGG         |
| LEU3 (H)      | 10     | 0.7506     | 1.082       | CCGGTACCGG         |
| LEU3 (Z)      | 9      | 0.6505     | 1.165       | ACCGGCGAA          |
| LYS14 (B)     | 8      | 0.4757     | 1.447       | CCGGAATT           |
| LYS14 (Z)     | 8      | 0.3886     | 1.706       | AAATTCCG           |
| MAC1 (H)      | 7      | 0.4320     | 1.721       | GAGCAAA            |
| MAC1 (M)      | 9      | 0.4837     | 0.886       | GAGCGAAAA          |
| MATA1 (M)     | 7      | 0.3610     | 1.591       | [A/G]CACAAT        |
| MATALPHA2 (Z) | 8      | 0.2635     | 1.566       | AACAATAG           |
| MBP1 (B)      | 6      | 0.7109     | 1.191       | ACGCGT             |
| MBP1 (H)      | 7      | 0.6417     | 1.327       | GACGCGT            |
| MBP1 (Z)      | 8      | 0.6266     | 1.494       | ACGCGTCA           |
| MCM1 (H)      | 12     | 0.4435     | 0.691       | TTCTAATTAGG        |
| MCM1 (Z)      | 12     | 0.4647     | 0.732       | TCCCAATTCGGA       |
| MET28 (M)     | 6      | 0.6621     | 1.708       | CTGTGG             |
| MET31 (B)     | 9      | 0.6745     | 1.232       | [A/G]GTGTGGCG      |
| MET31 (H)     | 9      | 0.4471     | 1.721       | AAACTGTGG          |
| MET31 (M)     | 7      | 0.6041     | 1.419       | GGTGTGG            |
| MET32 (B)     | 7      | 0.6674     | 1.291       | CGCCACA            |
| MET32 (M)     | 9      | 0.5688     | 1.641       | AACTGTGGC          |
| MET32 (Z)     | 9      | 0.6486     | 1.513       | AGTGTGGCG          |
| MET4 (H)      | 13     | 0.4695     | 1.279       | AAAAAATGTGGTG      |
| MET4 (M)      | 8      | 0.5271     | 1.720       | AACTGTGG           |
| MGA1 (Z)      | 9      | 0.3672     | 1.194       | ATAGAACAC          |
| MIG1 (B)      | 6      | 0.8992     | 1.511       | CCCCGC             |
| MIG1 (M)      | 10     | 0.5494     | 1.229       | AAAAG[C/T]GGGG     |

Continued on next page

| TF (Study) | Length | GC content | Information | Canonical sequence |
|------------|--------|------------|-------------|--------------------|
| MIG1 (Z)   | 8      | 0.7577     | 1.489       | ATGCGGGG           |
| MIG2 (Z)   | 9      | 0.6774     | 1.433       | CCCCGCAAT          |
| MOT3 (H)   | 6      | 0.4738     | 1.343       | [A/C/T]AGG[C/T]A   |
| MSN2 (B)   | 5      | 0.8783     | 1.733       | AGGGG              |
| MSN2 (H)   | 9      | 0.7076     | 1.297       | AAGGGGCGG          |
| MSN2 (M)   | 7      | 0.7322     | 1.379       | AAGGGGC            |
| MSN4 (H)   | 6      | 0.7379     | 1.572       | [A/C]AGGGG         |
| NDD1 (H)   | 13     | 0.4831     | 0.827       | TTTCCCAATTGGG      |
| NDD1 (M)   | 10     | 0.4612     | 1.046       | AAAGGGGAAA         |
| NDT80 (Z)  | 9      | 0.3908     | 1.373       | GCCACAAAA          |
| NHP10 (B)  | 8      | 0.8500     | 1.490       | GCCGGGGA           |
| NHP6A (Z)  | 10     | 0.1542     | 0.892       | CTATATATAA         |
| NHP6B (Z)  | 12     | 0.1860     | 0.575       | TATTTATATATA       |
| NRG1 (H)   | 7      | 0.7019     | 1.490       | GGACCCT            |
| NRG1 (Z)   | 8      | 0.6600     | 1.570       | CAGGGTCC           |
| OAF1 (B)   | 8      | 0.5982     | 1.263       | CGGAGATA           |
| OAF1 (Z)   | 9      | 0.4490     | 1.121       | TAAATCCGA          |
| OPI1 (H)   | 7      | 0.5000     | 1.594       | TCGAA[C/T]C        |
| OPI1 (M)   | 6      | 0.6020     | 1.636       | GAACCG             |
| PBF2 (Z)   | 8      | 0.5923     | 1.426       | CTCATCGC           |
| PDR1 (B)   | 8      | 0.7917     | 1.251       | TCCGCGGA           |
| PDR1 (H)   | 8      | 0.5249     | 1.250       | GCCGAATA           |
| PDR1 (M)   | 9      | 0.6619     | 1.189       | CCGCCGAAA          |
| PDR3 (H)   | 8      | 0.7378     | 1.720       | TCCGCGGA           |
| PDR8 (B)   | 8      | 0.5721     | 1.536       | [A/G]CGGAGAT       |
| PHD1 (B)   | 7      | 0.5956     | 1.095       | CCTGCAG            |
| PHD1 (H)   | 8      | 0.7951     | 0.868       | GCTGCAGG           |
| PHD1 (M)   | 6      | 0.6442     | 1.271       | AGGCAC             |
| PHD1 (Z)   | 9      | 0.4736     | 1.118       | CATGCATCA          |
| PHO2 (B)   | 6      | 0.0141     | 1.226       | ATAATA             |
| PHO2 (H)   | 11     | 0.7657     | 1.320       | CGTGCGGTGCG        |
| PHO2 (M)   | 6      | 0.1725     | 1.328       | ATTAAG             |
| PHO2 (Z)   | 8      | 0.0733     | 0.973       | ATTAATTA           |
| PHO4 (B)   | 7      | 0.7383     | 1.048       | GCGCGTG            |

Continued on next page

| TF (Study) | Length | GC content | Information | Canonical sequence         |
|------------|--------|------------|-------------|----------------------------|
| PHO4 (H)   | 7      | 0.6518     | 1.321       | CACGTGG                    |
| PHO4 (Z)   | 8      | 0.6863     | 1.364       | GCACGTGC                   |
| PUT3 (B)   | 8      | 0.7943     | 1.312       | CCCGGGAA                   |
| PUT3 (H)   | 16     | 0.6785     | 0.645       | CGG . . . . . CCG          |
| PUT3 (M)   | 9      | 0.7589     | 1.721       | CGGGAAGCC                  |
| PUT3 (Z)   | 8      | 0.7047     | 0.983       | TCCCGGGA                   |
| RAP1 (B)   | 9      | 0.4864     | 1.310       | ACCCATACA                  |
| RAP1 (M)   | 10     | 0.5890     | 1.175       | ACCCATACAC                 |
| RAP1 (Z)   | 8      | 0.6003     | 1.296       | GGGTGTAC                   |
| RDR1 (B)   | 8      | 0.6027     | 1.496       | TGCGGAAC                   |
| RDR1 (Z)   | 8      | 0.5681     | 1.244       | TGCGGATA                   |
| RDS1 (B)   | 7      | 0.9361     | 1.393       | CGGCCG[A/C/G]              |
| RDS1 (Z)   | 8      | 0.7921     | 1.620       | TCGGCCGA                   |
| RDS2 (B)   | 7      | 0.7444     | 1.452       | CTCGGGG                    |
| RDS2 (Z)   | 9      | 0.4640     | 1.225       | AAAACCCGA                  |
| REB1 (B)   | 8      | 0.5250     | 1.668       | GTTACCCG                   |
| REI1 (B)   | 7      | 0.7381     | 1.648       | CCCCTGA                    |
| RFX1 (B)   | 8      | 0.4952     | 1.415       | GGTTGC[C/T]A               |
| RFX1 (H)   | 13     | 0.4651     | 1.195       | TTGCCATGGCAAC              |
| RGT1 (H)   | 7      | 0.5680     | 1.229       | CGGA . . A                 |
| RGT1 (M)   | 8      | 0.3684     | 1.844       | CGGAAAAA                   |
| RGT1 (Z)   | 9      | 0.4041     | 1.360       | CGGAAAAAT                  |
| RIM101 (B) | 7      | 0.6458     | 1.758       | CGCCAAG                    |
| RIM101 (H) | 7      | 0.5680     | 1.721       | TGCCAAG                    |
| RLM1 (H)   | 10     | 0.2145     | 1.367       | CTA[A/T][A/T][A/T][A/T]TAG |
| RLM1 (M)   | 9      | 0.2591     | 1.012       | TATTTATAG                  |
| RLR1 (H)   | 11     | 0.2196     | 1.287       | ATTTTCTTCTT                |
| RLR1 (M)   | 13     | 0.3751     | 1.442       | ACAGTACTTACAG              |
| RME1 (M)   | 10     | 0.4143     | 0.960       | TCCAAAGGAA                 |
| ROX1 (B)   | 5      | 0.2008     | 1.976       | ACAAT                      |
| ROX1 (H)   | 9      | 0.3414     | 1.425       | [C/T][C/G][C/T]ATTGTT      |
| ROX1 (M)   | 9      | 0.6305     | 0.951       | AAAAGCCCG                  |
| RPH1 (B)   | 8      | 0.5625     | 1.467       | ACCCCTAA                   |
| RPH1 (H)   | 10     | 0.5952     | 1.721       | CCCCTAAGG                  |

Continued on next page

| TF (Study) | Length | GC content | Information | Canonical sequence             |
|------------|--------|------------|-------------|--------------------------------|
| RPH1 (Z)   | 8      | 0.4977     | 1.333       | ATTAGGGG                       |
| RPN4 (B)   | 7      | 0.8078     | 1.633       | GGTGGCG                        |
| RPN4 (H)   | 8      | 0.6124     | 1.599       | TTGCCACC                       |
| RPN4 (M)   | 9      | 0.5944     | 1.543       | GGTGGCAAA                      |
| RPN4 (Z)   | 8      | 0.8655     | 1.689       | CGCCACCC                       |
| RSC3 (B)   | 5      | 0.9364     | 1.531       | CGCGC                          |
| RSC3 (Z)   | 12     | 0.7270     | 0.971       | CGCGCGCTCTGT                   |
| RSC30 (B)  | 8      | 0.9423     | 1.260       | CGCGCGCG                       |
| RSC30 (Z)  | 10     | 0.9026     | 1.115       | CGCGCGCGCG                     |
| RTG3 (H)   | 6      | 0.6584     | 1.720       | GGTCAC                         |
| RTG3 (M)   | 8      | 0.5221     | 1.291       | ATGACGCA                       |
| RTG3 (Z)   | 8      | 0.6791     | 1.391       | GCACGTGC                       |
| SFL1 (M)   | 8      | 0.5000     | 1.708       | GAAGCTTC                       |
| SFL1 (Z)   | 9      | 0.3694     | 0.976       | ATAGAAGAA                      |
| SFP1 (M)   | 9      | 0.5466     | 1.264       | ATGTACGGG                      |
| SFP1 (Z)   | 9      | 0.0822     | 1.172       | AAAAATTTT                      |
| SIG1 (B)   | 5      | 0.0103     | 1.827       | ATATA                          |
| SIG1 (H)   | 12     | 0.3021     | 1.247       | AGGAA[A/T]CAAAAA               |
| SIP4 (B)   | 7      | 0.7016     | 1.241       | CTCCGGA                        |
| SIP4 (H)   | 11     | 0.5428     | 1.119       | CGGATTAATGG                    |
| SIP4 (Z)   | 8      | 0.5761     | 1.214       | TTCCGGA                        |
| SKN7 (B)   | 5      | 0.9012     | 1.557       | GGCCA                          |
| SKN7 (H)   | 9      | 0.8154     | 0.712       | GCCTGGGCC                      |
| SKN7 (M)   | 8      | 0.8377     | 0.955       | GCCGGGCC                       |
| SKN7 (Z)   | 16     | 0.4965     | 0.461       | AGTTATGGCCATATCT               |
| SKO1 (H)   | 6      | 0.5000     | 1.721       | ACGTCA                         |
| SKO1 (M)   | 7      | 0.4761     | 1.353       | TACGTCA                        |
| SMP1 (H)   | 14     | 0.2281     | 1.468       | ACTACTA[A/T][A/T][A/T][A/T]TAG |
| SMP1 (Z)   | 10     | 0.2199     | 0.715       | CTATAATTAA                     |
| SNF1 (M)   | 15     | 0.6573     | 1.808       | GGGGATCGAACCCGG                |
| SNT2 (H)   | 9      | 0.6591     | 1.203       | GGCGCTATC                      |
| SOK2 (B)   | 9      | 0.5326     | 0.881       | ACCTGCAGG                      |
| SOK2 (H)   | 8      | 0.5737     | 0.817       | TGCAGGAA                       |
| SOK2 (M)   | 8      | 0.5875     | 1.096       | GCAGGCAA                       |

Continued on next page

| TF (Study) | Length | GC content | Information | Canonical sequence  |
|------------|--------|------------|-------------|---------------------|
| SPT15 (Z)  | 10     | 0.1534     | 1.260       | GATATATATA          |
| SPT2 (H)   | 10     | 0.3212     | 1.128       | CCTGTATTTA          |
| SPT2 (M)   | 10     | 0.2531     | 1.086       | AATTAAAGAA          |
| SPT23 (H)  | 8      | 0.1951     | 1.212       | AAAATCAA            |
| SRD1 (Z)   | 8      | 0.4117     | 1.696       | AGATCTAC            |
| STB1 (H)   | 9      | 0.5186     | 0.868       | AAACGCGAA           |
| STB1 (M)   | 8      | 0.5211     | 1.463       | CGCGAAAA            |
| STB2 (M)   | 8      | 0.6058     | 1.364       | CGGGTAAG            |
| STB3 (Z)   | 9      | 0.1468     | 1.491       | AATTTTTCA           |
| STB4 (H)   | 9      | 0.5947     | 1.192       | TCGG[A/T][A/T]CGA   |
| STB5 (B)   | 8      | 0.5856     | 1.072       | CGGTGTTA            |
| STB5 (H)   | 9      | 0.4581     | 1.149       | CGGTGTTAT           |
| STB5 (M)   | 10     | 0.5053     | 0.947       | CGGTGTTATA          |
| STE12 (B)  | 7      | 0.3095     | 1.867       | TGAAACA             |
| STP1 (H)   | 12     | 0.8173     | 1.216       | CGGC . . .[A/G]CGGC |
| STP1 (M)   | 8      | 0.8396     | 1.279       | TGCGGCGG            |
| STP2 (Z)   | 8      | 0.7897     | 1.246       | GCGCCGCA            |
| STP3 (B)   | 9      | 0.5964     | 1.220       | GCTAGCGCA           |
| STP4 (M)   | 14     | 0.8355     | 1.457       | CGCCGTGGGACGCG      |
| STP4 (Z)   | 10     | 0.6270     | 1.096       | GTGCGGCTGA          |
| SUM1 (B)   | 8      | 0.0700     | 1.127       | AAATTTTT            |
| SUM1 (H)   | 9      | 0.4243     | 0.818       | TGTCAGAAA           |
| SUM1 (Z)   | 8      | 0.0154     | 1.079       | AATTAATT            |
| SUT1 (H)   | 10     | 0.8387     | 0.694       | GCGGGGCCGG          |
| SUT1 (M)   | 7      | 0.8536     | 1.021       | CGCGGGG             |
| SUT2 (Z)   | 8      | 0.5272     | 1.644       | AACTCCGA            |
| SWI4 (B)   | 8      | 0.5337     | 1.492       | ACGCGAAA            |
| SWI5 (B)   | 8      | 0.6202     | 1.423       | TGCTGGTT            |
| SWI5 (H)   | 6      | 0.6586     | 1.425       | [G/T]GCTG[A/G]      |
| SWI5 (M)   | 6      | 0.7152     | 1.050       | TGCTGG              |
| SWI6 (M)   | 6      | 0.7675     | 1.425       | GACGCG              |
| TBF1 (B)   | 7      | 0.5349     | 1.246       | AACCCTA             |
| TBF1 (Z)   | 8      | 0.4219     | 1.651       | AACCCTAA            |
| TBS1 (Z)   | 8      | 0.7561     | 1.706       | CGGATCCG            |

Continued on next page



| TF (Study)  | Length | GC content | Information | Canonical sequence |
|-------------|--------|------------|-------------|--------------------|
| TEA1 (B)    | 8      | 0.7062     | 1.166       | GCGG[A/G]CAT       |
| TEA1 (Z)    | 15     | 0.3749     | 1.239       | CGGAAATTAAATACC    |
| TEC1 (H)    | 7      | 0.3790     | 1.267       | AAGAATG            |
| TEC1 (M)    | 7      | 0.4341     | 1.400       | ACATTCT            |
| TEC1 (Z)    | 8      | 0.3856     | 1.451       | ACATTCTT           |
| THI2 (H)    | 12     | 0.3359     | 0.898       | GAAACTCTAAGA       |
| TOS8 (B)    | 8      | 0.4111     | 1.288       | CTGTCAAA           |
| TYE7 (B)    | 7      | 0.5857     | 1.700       | CACGTGA            |
| TYE7 (Z)    | 8      | 0.5265     | 1.361       | TCACGTGA           |
| UGA3 (B)    | 8      | 0.8281     | 1.371       | CGGCGGGA           |
| UGA3 (H)    | 10     | 0.7856     | 1.032       | CCG . . . . CGG    |
| UME1 (H)    | 11     | 0.2669     | 1.240       | AAGGAAAAGTA        |
| UME6 (B)    | 8      | 0.7422     | 1.159       | CGCGGC[A/T]A       |
| UME6 (M)    | 9      | 0.7749     | 1.397       | AGCCGCCGA          |
| UME6 (Z)    | 8      | 0.7109     | 1.439       | GGCGGCTA           |
| UPC2 (B)    | 6      | 0.4080     | 1.420       | ATACGA             |
| USV1 (Z)    | 8      | 0.6231     | 1.703       | CCCCTGAA           |
| XBP1 (B)    | 6      | 0.5248     | 1.482       | CTCGAG             |
| XBP1 (H)    | 7      | 0.5680     | 1.721       | CTTCGAG            |
| XBP1 (M)    | 8      | 0.6270     | 1.346       | CTCGAGGA           |
| XBP1 (Z)    | 8      | 0.5310     | 1.224       | TCTCGAGA           |
| YAP1 (H)    | 8      | 0.3250     | 1.435       | TTAGTCAG           |
| YAP1 (M)    | 9      | 0.4232     | 1.152       | GCTGACTAA          |
| YAP3 (B)    | 8      | 0.3317     | 1.552       | ATTACGTA           |
| YAP5 (M)    | 6      | 0.3216     | 1.344       | AAGCAT             |
| YAP6 (M)    | 8      | 0.2860     | 1.160       | TTACATAA           |
| YAP6 (Z)    | 10     | 0.3454     | 0.890       | GATTACGTAA         |
| YAP7 (H)    | 8      | 0.2395     | 1.099       | ATTAGTAA           |
| YBL054W (B) | 8      | 0.6875     | 1.367       | CGATGCCC           |
| YBR239C (B) | 8      | 0.5662     | 1.427       | ACCGGAAC           |
| YDR026C (H) | 8      | 0.6427     | 1.843       | TTACCCGG           |
| YDR026C (M) | 6      | 0.8331     | 1.992       | ACCCGG             |
| YDR520C (M) | 9      | 0.8800     | 1.561       | CTCCGGCGG          |
| YDR520C (Z) | 8      | 0.4968     | 1.758       | CGGAGATA           |

Continued on next page

| TF (Study)  | Length | GC content | Information | Canonical sequence     |
|-------------|--------|------------|-------------|------------------------|
| YER051W (M) | 6      | 0.3004     | 1.787       | TTCGAA                 |
| YER130C (Z) | 8      | 0.5021     | 1.646       | AATAGGGG               |
| YER184C (B) | 8      | 0.6635     | 1.157       | CTCCGGAA               |
| YGR067C (Z) | 8      | 0.7498     | 1.507       | GCGGGGTA               |
| YHP1 (H)    | 6      | 0.1828     | 1.720       | TAATTG                 |
| YJL103C (B) | 8      | 0.7300     | 0.958       | CTCCGGAG               |
| YKL222C (B) | 8      | 0.5208     | 1.284       | ACGGAAAT               |
| YKL222C (Z) | 8      | 0.4764     | 1.292       | CGGAAATA               |
| YLL054C (B) | 7      | 0.8061     | 1.220       | CGGCCGA                |
| YLL054C (Z) | 18     | 0.6200     | 0.554       | TCCGT . . . . . CGGA   |
| YLR278C (B) | 8      | 0.5915     | 1.322       | CCGGAGTT               |
| YML081W (B) | 7      | 0.7921     | 1.543       | CCCCGCA                |
| YML081W (M) | 9      | 0.4941     | 1.648       | CCAGTCTGA              |
| YML081W (Z) | 8      | 0.7449     | 1.516       | ACCCCGCA               |
| YNR063W (Z) | 8      | 0.5062     | 1.494       | ATCTCCGA               |
| YOX1 (H)    | 10     | 0.2621     | 1.459       | A[C/G]AATA . TGA       |
| YOX1 (M)    | 19     | 0.4060     | 1.441       | ATTACGTTTCCTAAAAGGG    |
| YOX1 (Z)    | 8      | 0.1038     | 1.378       | TTAATTAA               |
| YPR013C (B) | 8      | 0.4492     | 1.332       | TGTAGATC               |
| YPR015C (Z) | 8      | 0.3621     | 1.708       | CGTAAATC               |
| YPR022C (B) | 6      | 0.7760     | 1.789       | CCCCAC                 |
| YPR196W (Z) | 9      | 0.4423     | 0.949       | ATTTCTCCG              |
| YRR1 (B)    | 9      | 0.4627     | 1.070       | TTATCTCCG              |
| YRR1 (M)    | 11     | 0.4248     | 1.379       | TTTTGTTACCC            |
| YRR1 (Z)    | 9      | 0.3695     | 1.515       | CGGAAATAA              |
| ZAP1 (H)    | 14     | 0.4331     | 1.625       | ACCCT[A/C]AAGGTT[A/G]T |
| ZAP1 (M)    | 11     | 0.4755     | 1.683       | ACCTTAAAGGT            |
| ZMS1 (B)    | 9      | 0.6889     | 1.156       | TTCCCCGCA              |
