# Supplementary material for: Redundancy and the Evolution of Cis-Regulatory Element Multiplicity
Source: PubMed Central journal article supplement (PMC2900288; doi:10.1371/journal.pcbi.1000848), 2010-07-08
Supplement: pcbi.1000848.s007.pdf [file pcbi.1000848.s007.pdf]

**Table S2.** Binding site PWM models not considered in our study. These PWMs were excluded because they were almost identical to the PWMs listed in the ‘Equivalent’ column, shown in Table S1. Letters in parentheses after TF names indicate the study from which we took the PWM data: B, Badis *et al.* (2008); H, Harbison *et al.* (2004); M, MacIsaac *et al.* (2006); Zhu *et al.* (2009).

| TF (Study) | Equivalent  |
|------------|-------------|
| ACE2 (H)   | SWI5 (B)    |
| ADR1 (B)   | YPR022C (B) |
| ADR1 (M)   | ADR1 (H)    |
| CBF1 (H)   | TYE7 (B)    |
| CIN5 (B)   | YAP6 (Z)    |
| CUP9 (Z)   | CUP9 (B)    |
| DAL80 (H)  | GLN3 (B)    |
| DAL80 (M)  | GLN3 (B)    |
| DAL81 (M)  | DAL81 (H)   |
| DIG1 (H)   | STE12 (B)   |
| EDS1 (B)   | RGT1 (Z)    |
| FHL1 (B)   | FHL1 (Z)    |
| FHL1 (H)   | RAP1 (B)    |
| FHL1 (M)   | RAP1 (B)    |
| FKH1 (H)   | FKH2 (Z)    |
| FKH1 (M)   | FKH2 (Z)    |
| FKH1 (Z)   | FKH2 (Z)    |
| FKH2 (M)   | FKH2 (H)    |
| GAL80 (H)  | GAL4 (H)    |
| GAL80 (M)  | GAL4 (H)    |
| GAT1 (B)   | GZF3 (Z)    |
| GAT1 (M)   | GAT1 (H)    |
| GAT3 (Z)   | SRD1 (Z)    |
| GAT4 (B)   | ECM23 (B)   |
| GCN4 (H)   | GCN4 (Z)    |
| GZF3 (B)   | DAL80 (B)   |
| GZF3 (M)   | GZF3 (H)    |
| HAL9 (Z)   | YLL054C (Z) |
| HAP1 (B)   | YKL222C (Z) |

Continued on next page

| TF (Study) | Equivalent  |
|------------|-------------|
| HAP3 (H)   | HAP2 (H)    |
| HAP3 (M)   | HAP2 (H)    |
| HAP5 (H)   | HAP2 (H)    |
| HAP5 (M)   | HAP2 (H)    |
| HSF1 (M)   | HSF1 (H)    |
| INO4 (M)   | INO4 (H)    |
| LEU3 (M)   | LEU3 (H)    |
| MBP1 (M)   | MBP1 (H)    |
| MCM1 (M)   | NDD1 (H)    |
| MET32 (H)  | MET31 (H)   |
| MIG2 (B)   | MIG1 (B)    |
| MIG3 (B)   | MIG1 (B)    |
| MIG3 (Z)   | YML081W (Z) |
| MOT3 (M)   | MOT3 (H)    |
| MSN4 (B)   | MSN2 (B)    |
| MSN4 (M)   | MSN2 (M)    |
| NRG1 (M)   | NRG1 (H)    |
| PBF1 (Z)   | PBF2 (Z)    |
| PDR1 (Z)   | SIP4 (Z)    |
| PDR3 (M)   | PDR3 (H)    |
| PHO4 (M)   | PHO4 (H)    |
| RAP1 (H)   | RAP1 (B)    |
| RCS1 (H)   | AFT1 (Z)    |
| RCS1 (M)   | AFT2 (M)    |
| RDS1 (H)   | RDS1 (Z)    |
| RDS1 (M)   | RDS1 (B)    |
| REB1 (H)   | STB2 (M)    |
| REB1 (M)   | YDR026C (H) |
| RFX1 (M)   | RFX1 (H)    |
| RGM1 (B)   | MSN2 (B)    |
| RGT1 (B)   | RGT1 (Z)    |
| RIM101 (M) | RIM101 (H)  |
| RPH1 (M)   | RPH1 (H)    |
| SFP1 (H)   | RAP1 (B)    |

Continued on next page

| TF (Study)  | Equivalent  |
|-------------|-------------|
| SIP4 (M)    | SIP4 (H)    |
| SMP1 (M)    | SMP1 (H)    |
| SNT2 (M)    | SNT2 (H)    |
| SPT23 (M)   | SPT23 (H)   |
| SRD1 (B)    | GAT3 (B)    |
| STB4 (B)    | CEP3 (B)    |
| STB4 (M)    | STB4 (H)    |
| STE12 (H)   | STE12 (B)   |
| STE12 (M)   | STE12 (B)   |
| STP4 (B)    | STP3 (B)    |
| SUM1 (M)    | SUM1 (H)    |
| SWI4 (H)    | SWI4 (B)    |
| SWI4 (M)    | SWI4 (B)    |
| SWI6 (H)    | SWI4 (B)    |
| TBS1 (B)    | TBS1 (Z)    |
| TEC1 (B)    | TEC1 (Z)    |
| THI2 (M)    | THI2 (H)    |
| TYE7 (H)    | TYE7 (Z)    |
| TYE7 (M)    | CBF1 (M)    |
| UGA3 (M)    | UGA3 (H)    |
| UME6 (H)    | UME6 (Z)    |
| YAP1 (Z)    | CIN5 (H)    |
| YAP3 (H)    | ARR1 (H)    |
| YAP3 (M)    | ARR1 (H)    |
| YAP5 (H)    | ARR1 (H)    |
| YAP6 (H)    | ARR1 (H)    |
| YAP7 (M)    | YAP7 (H)    |
| YBR239C (Z) | SIP4 (Z)    |
| YDR520C (B) | YKL222C (Z) |
| YER130C (B) | YER130C (Z) |
| YGR067C (B) | MIG1 (B)    |
| YHP1 (M)    | YHP1 (H)    |
| YNR063W (B) | YNR063W (Z) |
| YOX1 (B)    | YOX1 (Z)    |

Continued on next page

| TF (Study)  | Equivalent  |
|-------------|-------------|
| YPL230W (B) | MSN2 (B)    |
| YPR013C (Z) | YPR015C (Z) |
| YPR196W (B) | YPR196W (Z) |
| YRM1 (B)    | YKL222C (B) |
| YRM1 (Z)    | YKL222C (Z) |
