# Supplementary material for: Redundancy and the Evolution of Cis-Regulatory Element Multiplicity
Source: PubMed Central journal article supplement (PMC2900288; doi:10.1371/journal.pcbi.1000848), 2010-07-08
Supplement: pcbi.1000848.s008.pdf [file pcbi.1000848.s008.pdf]

**Table S3.** Data used to construct Figure 6. The data are sorted by decreasing  $M_{\text{Obs}}/M_{\text{Exp}}$ . The second and third columns show the Total number of binding sites revealed in a scan across the number of promoter regions in the ‘Prom’ column (the numbers vary because the minimum promoter length considered in each scan is twice the length of the PWM). Letters in parentheses after TF names indicate the study from which we took the PWM data: B, Badis *et al.* (2008); H, Harbison *et al.* (2004); M, MacIsaac *et al.* (2006); Zhu *et al.* (2009).

| TF (Study)  | Total | Prom | $M_{\text{Obs}}$ | $M_{\text{Exp}}$ | $M_{\text{Obs}}/M_{\text{Exp}}$ |
|-------------|-------|------|------------------|------------------|---------------------------------|
| ZAP1 (H)    | 2     | 3007 | 1.0000           | 0.0003           | 3007.427                        |
| RSC30 (Z)   | 3     | 3020 | 0.5000           | 0.0005           | 1006.881                        |
| ZAP1 (M)    | 3     | 3020 | 0.5000           | 0.0005           | 1006.881                        |
| SIP4 (H)    | 5     | 3020 | 0.2500           | 0.0008           | 302.107                         |
| INO2 (M)    | 9     | 3021 | 0.2857           | 0.0015           | 191.932                         |
| ASH1 (M)    | 8     | 3020 | 0.1429           | 0.0013           | 107.918                         |
| YAP6 (Z)    | 17    | 3020 | 0.2143           | 0.0028           | 76.226                          |
| MCM1 (H)    | 13    | 3014 | 0.0909           | 0.0022           | 42.193                          |
| RSC30 (B)   | 68    | 3023 | 0.3830           | 0.0112           | 34.216                          |
| PDR1 (M)    | 16    | 3021 | 0.0667           | 0.0026           | 25.204                          |
| LEU3 (B)    | 16    | 3020 | 0.0667           | 0.0026           | 25.195                          |
| CBF1 (M)    | 43    | 3023 | 0.1667           | 0.0071           | 23.506                          |
| XBP1 (M)    | 48    | 3023 | 0.1707           | 0.0079           | 21.579                          |
| MBP1 (Z)    | 31    | 3023 | 0.1071           | 0.0051           | 20.942                          |
| NDD1 (H)    | 18    | 3010 | 0.0588           | 0.0030           | 19.698                          |
| PUT3 (B)    | 20    | 3023 | 0.0526           | 0.0033           | 15.933                          |
| SMP1 (Z)    | 37    | 3020 | 0.0882           | 0.0061           | 14.442                          |
| INO4 (H)    | 30    | 3023 | 0.0714           | 0.0050           | 14.426                          |
| GAT3 (M)    | 44    | 3023 | 0.1000           | 0.0073           | 13.784                          |
| MET4 (M)    | 42    | 3023 | 0.0769           | 0.0069           | 11.106                          |
| YLL054C (B) | 24    | 3025 | 0.0435           | 0.0040           | 10.979                          |
| SKN7 (H)    | 66    | 3021 | 0.1071           | 0.0109           | 9.855                           |
| RDS2 (B)    | 47    | 3025 | 0.0682           | 0.0077           | 8.806                           |
| UME6 (M)    | 28    | 3021 | 0.0385           | 0.0046           | 8.316                           |
| RPN4 (B)    | 28    | 3025 | 0.0370           | 0.0046           | 8.019                           |
| PHO4 (B)    | 148   | 3025 | 0.1901           | 0.0242           | 7.853                           |
| UGA3 (H)    | 72    | 3020 | 0.0909           | 0.0119           | 7.665                           |

Continued on next page

| TF (Study)  | Total | Prom | $M_{\text{Obs}}$ | $M_{\text{Exp}}$ | $M_{\text{Obs}}/M_{\text{Exp}}$ |
|-------------|-------|------|------------------|------------------|---------------------------------|
| SUT1 (M)    | 41    | 3025 | 0.0513           | 0.0068           | 7.589                           |
| RPH1 (Z)    | 41    | 3023 | 0.0513           | 0.0068           | 7.584                           |
| UME6 (B)    | 42    | 3023 | 0.0500           | 0.0069           | 7.219                           |
| SKN7 (M)    | 42    | 3023 | 0.0500           | 0.0069           | 7.219                           |
| YBL054W (B) | 52    | 3023 | 0.0612           | 0.0086           | 7.145                           |
| INO2 (H)    | 68    | 3025 | 0.0794           | 0.0112           | 7.095                           |
| STP1 (M)    | 88    | 3023 | 0.1013           | 0.0145           | 7.001                           |
| HSF1 (H)    | 43    | 3010 | 0.0488           | 0.0071           | 6.850                           |
| RDS1 (B)    | 44    | 3025 | 0.0476           | 0.0073           | 6.568                           |
| GAT1 (Z)    | 55    | 3023 | 0.0588           | 0.0091           | 6.492                           |
| SWI6 (M)    | 198   | 3027 | 0.2013           | 0.0322           | 6.241                           |
| LYS14 (B)   | 73    | 3023 | 0.0735           | 0.0120           | 6.122                           |
| YBR239C (B) | 32    | 3023 | 0.0323           | 0.0053           | 6.109                           |
| STB4 (H)    | 32    | 3021 | 0.0323           | 0.0053           | 6.105                           |
| RGT1 (Z)    | 82    | 3021 | 0.0822           | 0.0135           | 6.092                           |
| SFP1 (Z)    | 317   | 3021 | 0.2924           | 0.0513           | 5.701                           |
| IME1 (M)    | 34    | 3023 | 0.0312           | 0.0056           | 5.570                           |
| MET31 (B)   | 48    | 3021 | 0.0435           | 0.0079           | 5.492                           |
| CHA4 (B)    | 34    | 3023 | 0.0303           | 0.0056           | 5.402                           |
| TYE7 (B)    | 94    | 3025 | 0.0805           | 0.0154           | 5.213                           |
| YPR022C (B) | 168   | 3027 | 0.1370           | 0.0274           | 4.996                           |
| CBF1 (B)    | 72    | 3023 | 0.0588           | 0.0118           | 4.965                           |
| FKH2 (H)    | 36    | 3020 | 0.0286           | 0.0059           | 4.806                           |
| PUT3 (H)    | 63    | 3001 | 0.0500           | 0.0104           | 4.785                           |
| STB1 (M)    | 83    | 3023 | 0.0641           | 0.0136           | 4.697                           |
| CEP3 (Z)    | 74    | 3023 | 0.0571           | 0.0122           | 4.693                           |
| ACE2 (M)    | 52    | 3023 | 0.0400           | 0.0086           | 4.668                           |
| YPR196W (Z) | 75    | 3021 | 0.0571           | 0.0123           | 4.628                           |
| YER184C (B) | 37    | 3023 | 0.0278           | 0.0061           | 4.551                           |
| SFP1 (M)    | 65    | 3021 | 0.0484           | 0.0107           | 4.519                           |
| MET32 (B)   | 128   | 3025 | 0.0940           | 0.0210           | 4.484                           |
| PHO2 (Z)    | 258   | 3023 | 0.1831           | 0.0419           | 4.371                           |
| MBP1 (H)    | 127   | 3025 | 0.0870           | 0.0208           | 4.180                           |
| HAP4 (M)    | 55    | 3023 | 0.0377           | 0.0091           | 4.164                           |

Continued on next page

| TF (Study) | Total | Prom | $M_{\text{Obs}}$ | $M_{\text{Exp}}$ | $M_{\text{Obs}}/M_{\text{Exp}}$ |
|------------|-------|------|------------------|------------------|---------------------------------|
| UME6 (Z)   | 79    | 3023 | 0.0533           | 0.0130           | 4.105                           |
| HAC1 (B)   | 39    | 3025 | 0.0263           | 0.0064           | 4.094                           |
| NDD1 (M)   | 70    | 3020 | 0.0448           | 0.0115           | 3.883                           |
| FKH2 (Z)   | 101   | 3023 | 0.0632           | 0.0166           | 3.808                           |
| SWI4 (B)   | 71    | 3023 | 0.0441           | 0.0117           | 3.776                           |
| AFT2 (M)   | 93    | 3025 | 0.0575           | 0.0153           | 3.764                           |
| RPH1 (B)   | 58    | 3023 | 0.0357           | 0.0096           | 3.738                           |
| DAL82 (B)  | 58    | 3021 | 0.0357           | 0.0096           | 3.736                           |
| DAL80 (B)  | 72    | 3025 | 0.0441           | 0.0118           | 3.726                           |
| LYS14 (Z)  | 41    | 3023 | 0.0250           | 0.0068           | 3.697                           |
| STP2 (Z)   | 41    | 3023 | 0.0250           | 0.0068           | 3.697                           |
| SPT15 (Z)  | 162   | 3020 | 0.0946           | 0.0265           | 3.568                           |
| TEA1 (B)   | 42    | 3023 | 0.0244           | 0.0069           | 3.522                           |
| PDR1 (H)   | 60    | 3023 | 0.0345           | 0.0099           | 3.490                           |
| SWI5 (B)   | 74    | 3023 | 0.0423           | 0.0122           | 3.470                           |
| YAP3 (B)   | 146   | 3023 | 0.0821           | 0.0239           | 3.435                           |
| BAS1 (M)   | 153   | 3025 | 0.0851           | 0.0250           | 3.402                           |
| MAC1 (M)   | 61    | 3021 | 0.0339           | 0.0101           | 3.372                           |
| STB5 (B)   | 125   | 3023 | 0.0684           | 0.0205           | 3.337                           |
| MIG1 (B)   | 319   | 3027 | 0.1698           | 0.0515           | 3.297                           |
| GLN3 (H)   | 63    | 3021 | 0.0333           | 0.0104           | 3.211                           |
| YOX1 (H)   | 44    | 3020 | 0.0233           | 0.0073           | 3.202                           |
| ASG1 (B)   | 393   | 3027 | 0.2013           | 0.0631           | 3.189                           |
| NHP6B (Z)  | 716   | 3014 | 0.3571           | 0.1128           | 3.167                           |
| BAS1 (H)   | 234   | 3027 | 0.1148           | 0.0380           | 3.021                           |
| RGT1 (M)   | 166   | 3023 | 0.0811           | 0.0271           | 2.988                           |
| GAT3 (B)   | 93    | 3025 | 0.0455           | 0.0153           | 2.977                           |
| STB1 (H)   | 65    | 3021 | 0.0317           | 0.0107           | 2.965                           |
| AFT2 (B)   | 46    | 3023 | 0.0222           | 0.0076           | 2.930                           |
| FHL1 (Z)   | 47    | 3023 | 0.0217           | 0.0077           | 2.806                           |
| RDR1 (B)   | 67    | 3023 | 0.0308           | 0.0110           | 2.790                           |
| TBF1 (B)   | 118   | 3025 | 0.0536           | 0.0193           | 2.770                           |
| MET31 (M)  | 118   | 3025 | 0.0536           | 0.0193           | 2.770                           |
| STE12 (B)  | 218   | 3025 | 0.0969           | 0.0355           | 2.733                           |

Continued on next page

| TF (Study)  | Total | Prom | $M_{\text{Obs}}$ | $M_{\text{Exp}}$ | $M_{\text{Obs}}/M_{\text{Exp}}$ |
|-------------|-------|------|------------------|------------------|---------------------------------|
| OAF1 (Z)    | 48    | 3021 | 0.0213           | 0.0079           | 2.687                           |
| RTG3 (H)    | 130   | 3027 | 0.0569           | 0.0213           | 2.675                           |
| CRZ1 (M)    | 110   | 3025 | 0.0481           | 0.0180           | 2.665                           |
| YML081W (B) | 361   | 3025 | 0.1546           | 0.0581           | 2.659                           |
| CRZ1 (B)    | 69    | 3021 | 0.0299           | 0.0114           | 2.627                           |
| CIN5 (M)    | 100   | 3021 | 0.0421           | 0.0164           | 2.562                           |
| PHD1 (H)    | 86    | 3023 | 0.0361           | 0.0141           | 2.557                           |
| PHO4 (H)    | 70    | 3025 | 0.0294           | 0.0115           | 2.555                           |
| MET28 (M)   | 199   | 3027 | 0.0824           | 0.0324           | 2.543                           |
| CUP9 (B)    | 87    | 3023 | 0.0357           | 0.0143           | 2.497                           |
| DAL82 (H)   | 172   | 3025 | 0.0688           | 0.0281           | 2.448                           |
| MSN2 (M)    | 181   | 3025 | 0.0719           | 0.0295           | 2.433                           |
| YKL222C (Z) | 115   | 3023 | 0.0455           | 0.0189           | 2.409                           |
| HSF1 (B)    | 89    | 3023 | 0.0349           | 0.0146           | 2.385                           |
| ARG81 (M)   | 129   | 3023 | 0.0488           | 0.0211           | 2.307                           |
| PHD1 (M)    | 382   | 3027 | 0.1402           | 0.0614           | 2.284                           |
| AFT2 (H)    | 348   | 3027 | 0.1275           | 0.0561           | 2.273                           |
| CEP3 (B)    | 170   | 3025 | 0.0625           | 0.0278           | 2.251                           |
| YAP7 (H)    | 212   | 3023 | 0.0761           | 0.0345           | 2.205                           |
| XBP1 (Z)    | 53    | 3023 | 0.0192           | 0.0087           | 2.202                           |
| GAT1 (H)    | 183   | 3025 | 0.0643           | 0.0299           | 2.155                           |
| RDR1 (Z)    | 77    | 3023 | 0.0267           | 0.0127           | 2.105                           |
| RLM1 (M)    | 124   | 3021 | 0.0424           | 0.0203           | 2.083                           |
| GCN4 (Z)    | 79    | 3025 | 0.0260           | 0.0130           | 2.000                           |
| RSC3 (B)    | 583   | 3033 | 0.1824           | 0.0921           | 1.979                           |
| RTG3 (M)    | 98    | 3023 | 0.0316           | 0.0161           | 1.962                           |
| STB3 (Z)    | 330   | 3021 | 0.1044           | 0.0533           | 1.957                           |
| ARR1 (H)    | 276   | 3025 | 0.0866           | 0.0447           | 1.936                           |
| DIG1 (M)    | 57    | 3014 | 0.0179           | 0.0094           | 1.896                           |
| MBP1 (B)    | 566   | 3027 | 0.1696           | 0.0897           | 1.889                           |
| TEC1 (Z)    | 146   | 3023 | 0.0429           | 0.0239           | 1.793                           |
| SUM1 (H)    | 190   | 3021 | 0.0556           | 0.0310           | 1.791                           |
| SPT2 (M)    | 103   | 3020 | 0.0303           | 0.0169           | 1.790                           |
| GCR2 (M)    | 260   | 3025 | 0.0750           | 0.0422           | 1.778                           |

Continued on next page

| TF (Study)  | Total | Prom | $M_{\text{Obs}}$ | $M_{\text{Exp}}$ | $M_{\text{Obs}}/M_{\text{Exp}}$ |
|-------------|-------|------|------------------|------------------|---------------------------------|
| RME1 (M)    | 104   | 3020 | 0.0300           | 0.0171           | 1.755                           |
| SKO1 (H)    | 290   | 3027 | 0.0821           | 0.0469           | 1.750                           |
| SWI5 (M)    | 345   | 3027 | 0.0971           | 0.0556           | 1.746                           |
| ACE2 (B)    | 161   | 3025 | 0.0455           | 0.0263           | 1.728                           |
| NRG1 (H)    | 60    | 3025 | 0.0169           | 0.0099           | 1.716                           |
| GZF3 (H)    | 479   | 3027 | 0.1280           | 0.0764           | 1.675                           |
| ROX1 (H)    | 164   | 3021 | 0.0449           | 0.0268           | 1.673                           |
| SOK2 (H)    | 123   | 3023 | 0.0336           | 0.0202           | 1.667                           |
| HCM1 (B)    | 299   | 3023 | 0.0797           | 0.0484           | 1.647                           |
| ECM23 (B)   | 221   | 3027 | 0.0580           | 0.0359           | 1.613                           |
| TEC1 (M)    | 559   | 3025 | 0.1426           | 0.0887           | 1.606                           |
| PHD1 (B)    | 632   | 3025 | 0.1581           | 0.0998           | 1.584                           |
| HMRA2 (B)   | 180   | 3023 | 0.0465           | 0.0294           | 1.582                           |
| DAL82 (M)   | 142   | 3021 | 0.0365           | 0.0233           | 1.569                           |
| CAT8 (B)    | 535   | 3033 | 0.1327           | 0.0849           | 1.564                           |
| SKN7 (B)    | 863   | 3033 | 0.2081           | 0.1336           | 1.557                           |
| HAP2 (M)    | 63    | 3023 | 0.0161           | 0.0104           | 1.555                           |
| SKO1 (M)    | 90    | 3025 | 0.0227           | 0.0148           | 1.538                           |
| ECM22 (M)   | 144   | 3025 | 0.0360           | 0.0236           | 1.527                           |
| SUM1 (Z)    | 428   | 3023 | 0.1047           | 0.0686           | 1.525                           |
| MSN2 (B)    | 828   | 3033 | 0.1958           | 0.1285           | 1.523                           |
| SIP4 (B)    | 64    | 3025 | 0.0159           | 0.0105           | 1.507                           |
| FZF1 (B)    | 482   | 3027 | 0.1093           | 0.0769           | 1.421                           |
| TOS8 (B)    | 150   | 3023 | 0.0347           | 0.0245           | 1.415                           |
| MSN4 (H)    | 459   | 3027 | 0.1029           | 0.0734           | 1.403                           |
| XBP1 (B)    | 492   | 3027 | 0.1098           | 0.0784           | 1.400                           |
| ARG80 (M)   | 621   | 3027 | 0.1336           | 0.0981           | 1.362                           |
| CST6 (M)    | 824   | 3027 | 0.1742           | 0.1282           | 1.359                           |
| YDR026C (M) | 230   | 3027 | 0.0507           | 0.0374           | 1.356                           |
| SUM1 (B)    | 1452  | 3023 | 0.2923           | 0.2158           | 1.354                           |
| FKH2 (B)    | 232   | 3025 | 0.0507           | 0.0377           | 1.344                           |
| YAP1 (H)    | 68    | 3023 | 0.0149           | 0.0112           | 1.333                           |
| HAL9 (B)    | 1367  | 3033 | 0.2705           | 0.2038           | 1.327                           |
| ASH1 (H)    | 652   | 3027 | 0.1360           | 0.1027           | 1.323                           |

Continued on next page

| TF (Study)    | Total | Prom | $M_{\text{Obs}}$ | $M_{\text{Exp}}$ | $M_{\text{Obs}}/M_{\text{Exp}}$ |
|---------------|-------|------|------------------|------------------|---------------------------------|
| YHP1 (H)      | 849   | 3027 | 0.1731           | 0.1318           | 1.313                           |
| AZF1 (B)      | 1760  | 3025 | 0.3325           | 0.2553           | 1.302                           |
| RGT1 (H)      | 1146  | 3025 | 0.2230           | 0.1742           | 1.280                           |
| GTS1 (M)      | 557   | 3027 | 0.1120           | 0.0884           | 1.267                           |
| YPR013C (B)   | 143   | 3023 | 0.0288           | 0.0234           | 1.229                           |
| YLR278C (B)   | 71    | 3023 | 0.0143           | 0.0117           | 1.223                           |
| ADR1 (H)      | 2578  | 3033 | 0.4282           | 0.3504           | 1.222                           |
| SPT23 (H)     | 937   | 3023 | 0.1765           | 0.1447           | 1.219                           |
| YAP5 (M)      | 1719  | 3027 | 0.3016           | 0.2500           | 1.206                           |
| GLN3 (M)      | 103   | 3023 | 0.0200           | 0.0169           | 1.183                           |
| UPC2 (B)      | 1167  | 3027 | 0.2084           | 0.1770           | 1.178                           |
| NHP6A (Z)     | 146   | 3020 | 0.0282           | 0.0239           | 1.178                           |
| HAP2 (H)      | 1496  | 3033 | 0.2591           | 0.2209           | 1.173                           |
| TEC1 (H)      | 348   | 3025 | 0.0646           | 0.0561           | 1.152                           |
| OPI1 (M)      | 450   | 3027 | 0.0825           | 0.0720           | 1.147                           |
| MATALPHA2 (Z) | 128   | 3023 | 0.0240           | 0.0210           | 1.144                           |
| YER051W (M)   | 313   | 3027 | 0.0578           | 0.0506           | 1.144                           |
| PHO2 (M)      | 2409  | 3027 | 0.3781           | 0.3324           | 1.137                           |
| SWI5 (H)      | 899   | 3027 | 0.1569           | 0.1391           | 1.128                           |
| ECM22 (B)     | 74    | 3025 | 0.0137           | 0.0122           | 1.126                           |
| MOT3 (H)      | 2265  | 3027 | 0.3541           | 0.3160           | 1.121                           |
| UME1 (H)      | 106   | 3020 | 0.0192           | 0.0174           | 1.104                           |
| PHO2 (B)      | 4641  | 3027 | 0.5936           | 0.5406           | 1.098                           |
| GLN3 (B)      | 2949  | 3033 | 0.4253           | 0.3897           | 1.091                           |
| MATA1 (M)     | 278   | 3025 | 0.0491           | 0.0450           | 1.089                           |
| DOT6 (B)      | 4807  | 3033 | 0.5940           | 0.5520           | 1.076                           |
| ROX1 (B)      | 3262  | 3033 | 0.4491           | 0.4209           | 1.067                           |
| YAP6 (M)      | 467   | 3023 | 0.0789           | 0.0747           | 1.056                           |
| SIG1 (B)      | 7380  | 3033 | 0.7280           | 0.7045           | 1.033                           |
| CIN5 (H)      | 177   | 3023 | 0.0292           | 0.0289           | 1.011                           |
| MAC1 (H)      | 158   | 3025 | 0.0260           | 0.0258           | 1.006                           |
| RIM101 (H)    | 112   | 3025 | 0.0183           | 0.0184           | 0.999                           |
| RFX1 (B)      | 180   | 3023 | 0.0286           | 0.0294           | 0.972                           |
| RIM101 (B)    | 164   | 3025 | 0.0252           | 0.0268           | 0.939                           |

Continued on next page

| TF (Study)  | Total | Prom | $M_{\text{Obs}}$ | $M_{\text{Exp}}$ | $M_{\text{Obs}}/M_{\text{Exp}}$ |
|-------------|-------|------|------------------|------------------|---------------------------------|
| ABF2 (B)    | 164   | 3027 | 0.0250           | 0.0268           | 0.934                           |
| ARR1 (M)    | 637   | 3023 | 0.0936           | 0.1006           | 0.930                           |
| GIS1 (B)    | 185   | 3025 | 0.0279           | 0.0302           | 0.926                           |
| CHA4 (M)    | 116   | 3023 | 0.0175           | 0.0190           | 0.922                           |
| SFL1 (Z)    | 83    | 3021 | 0.0122           | 0.0137           | 0.893                           |
| XBP1 (H)    | 93    | 3025 | 0.0109           | 0.0153           | 0.712                           |
| SOK2 (M)    | 96    | 3023 | 0.0105           | 0.0158           | 0.667                           |
| YDR026C (H) | 101   | 3023 | 0.0100           | 0.0166           | 0.603                           |
| REB1 (B)    | 233   | 3023 | 0.0175           | 0.0379           | 0.461                           |
| STB2 (M)    | 268   | 3023 | 0.0152           | 0.0435           | 0.348                           |
| NRG1 (Z)    | 38    | 3023 | 0.0000           | 0.0063           | 0.000                           |
| RPN4 (Z)    | 6     | 3023 | 0.0000           | 0.0010           | 0.000                           |
| SIP4 (Z)    | 14    | 3023 | 0.0000           | 0.0023           | 0.000                           |
| YOX1 (Z)    | 55    | 3023 | 0.0000           | 0.0091           | 0.000                           |
| YPR015C (Z) | 35    | 3023 | 0.0000           | 0.0058           | 0.000                           |
| LEU3 (Z)    | 2     | 3021 | 0.0000           | 0.0003           | 0.000                           |
| PBF2 (Z)    | 88    | 3023 | 0.0000           | 0.0145           | 0.000                           |
| YLL054C (Z) | 2     | 2996 | 0.0000           | 0.0003           | 0.000                           |
| YER130C (Z) | 18    | 3023 | 0.0000           | 0.0030           | 0.000                           |
| RSC3 (Z)    | 5     | 3014 | 0.0000           | 0.0008           | 0.000                           |
| YML081W (Z) | 13    | 3023 | 0.0000           | 0.0021           | 0.000                           |
| MIG1 (Z)    | 9     | 3023 | 0.0000           | 0.0015           | 0.000                           |
| YNR063W (Z) | 14    | 3023 | 0.0000           | 0.0023           | 0.000                           |
| YGR067C (Z) | 16    | 3023 | 0.0000           | 0.0026           | 0.000                           |
| RDS1 (Z)    | 7     | 3023 | 0.0000           | 0.0012           | 0.000                           |
| SUT2 (Z)    | 21    | 3023 | 0.0000           | 0.0035           | 0.000                           |
| TBF1 (Z)    | 26    | 3023 | 0.0000           | 0.0043           | 0.000                           |
| CHA4 (Z)    | 24    | 3021 | 0.0000           | 0.0040           | 0.000                           |
| GSM1 (Z)    | 18    | 3021 | 0.0000           | 0.0030           | 0.000                           |
| RDS2 (Z)    | 26    | 3021 | 0.0000           | 0.0043           | 0.000                           |
| SRD1 (Z)    | 32    | 3023 | 0.0000           | 0.0053           | 0.000                           |
| ECM22 (Z)   | 2     | 3014 | 0.0000           | 0.0003           | 0.000                           |
| TBS1 (Z)    | 6     | 3023 | 0.0000           | 0.0010           | 0.000                           |
| CBF1 (Z)    | 7     | 3020 | 0.0000           | 0.0012           | 0.000                           |

Continued on next page

| TF (Study)  | Total | Prom | $M_{\text{Obs}}$ | $M_{\text{Exp}}$ | $M_{\text{Obs}}/M_{\text{Exp}}$ |
|-------------|-------|------|------------------|------------------|---------------------------------|
| YRR1 (Z)    | 15    | 3021 | 0.0000           | 0.0025           | 0.000                           |
| RAP1 (Z)    | 11    | 3023 | 0.0000           | 0.0018           | 0.000                           |
| GAL4 (Z)    | 7     | 2995 | 0.0000           | 0.0012           | 0.000                           |
| YDR520C (Z) | 24    | 3023 | 0.0000           | 0.0040           | 0.000                           |
| TYE7 (Z)    | 28    | 3023 | 0.0000           | 0.0046           | 0.000                           |
| ARO80 (Z)   | 39    | 3023 | 0.0000           | 0.0064           | 0.000                           |
| PHO4 (Z)    | 15    | 3023 | 0.0000           | 0.0025           | 0.000                           |
| PUT3 (Z)    | 2     | 3023 | 0.0000           | 0.0003           | 0.000                           |
| GAT4 (Z)    | 12    | 3023 | 0.0000           | 0.0020           | 0.000                           |
| MGA1 (Z)    | 58    | 3021 | 0.0000           | 0.0096           | 0.000                           |
| USV1 (Z)    | 21    | 3023 | 0.0000           | 0.0035           | 0.000                           |
| AFT1 (Z)    | 8     | 3021 | 0.0000           | 0.0013           | 0.000                           |
| MET32 (Z)   | 19    | 3021 | 0.0000           | 0.0031           | 0.000                           |
| NDT80 (Z)   | 44    | 3021 | 0.0000           | 0.0073           | 0.000                           |
| GZF3 (Z)    | 26    | 3023 | 0.0000           | 0.0043           | 0.000                           |
| MIG2 (Z)    | 11    | 3021 | 0.0000           | 0.0018           | 0.000                           |
| PHD1 (Z)    | 22    | 3021 | 0.0000           | 0.0036           | 0.000                           |
| STP4 (Z)    | 5     | 3020 | 0.0000           | 0.0008           | 0.000                           |
| BAS1 (Z)    | 5     | 3021 | 0.0000           | 0.0008           | 0.000                           |
| RTG3 (Z)    | 7     | 3023 | 0.0000           | 0.0012           | 0.000                           |
| ABF1 (B)    | 55    | 3007 | 0.0000           | 0.0091           | 0.000                           |
| CST6 (B)    | 87    | 3023 | 0.0000           | 0.0143           | 0.000                           |
| NHP10 (B)   | 9     | 3023 | 0.0000           | 0.0015           | 0.000                           |
| OAF1 (B)    | 31    | 3023 | 0.0000           | 0.0051           | 0.000                           |
| PDR1 (B)    | 25    | 3023 | 0.0000           | 0.0041           | 0.000                           |
| PDR8 (B)    | 55    | 3023 | 0.0000           | 0.0091           | 0.000                           |
| REI1 (B)    | 45    | 3025 | 0.0000           | 0.0074           | 0.000                           |
| SOK2 (B)    | 29    | 3021 | 0.0000           | 0.0048           | 0.000                           |
| STP3 (B)    | 22    | 3021 | 0.0000           | 0.0036           | 0.000                           |
| UGA3 (B)    | 29    | 3023 | 0.0000           | 0.0048           | 0.000                           |
| YJL103C (B) | 26    | 3023 | 0.0000           | 0.0043           | 0.000                           |
| YKL222C (B) | 60    | 3023 | 0.0000           | 0.0099           | 0.000                           |
| YRR1 (B)    | 40    | 3021 | 0.0000           | 0.0066           | 0.000                           |
| ZMS1 (B)    | 26    | 3021 | 0.0000           | 0.0043           | 0.000                           |

Continued on next page



| TF (Study)  | Total | Prom | $M_{\text{Obs}}$ | $M_{\text{Exp}}$ | $M_{\text{Obs}}/M_{\text{Exp}}$ |
|-------------|-------|------|------------------|------------------|---------------------------------|
| RAP1 (B)    | 32    | 3021 | 0.0000           | 0.0053           | 0.000                           |
| ABF1 (H)    | 50    | 3014 | 0.0000           | 0.0083           | 0.000                           |
| AZF1 (H)    | 29    | 3005 | 0.0000           | 0.0048           | 0.000                           |
| CAD1 (H)    | 23    | 3021 | 0.0000           | 0.0038           | 0.000                           |
| GAL4 (H)    | 2     | 2999 | 0.0000           | 0.0003           | 0.000                           |
| GCR1 (H)    | 8     | 3021 | 0.0000           | 0.0013           | 0.000                           |
| HAP1 (H)    | 4     | 3020 | 0.0000           | 0.0007           | 0.000                           |
| HAP4 (H)    | 38    | 3021 | 0.0000           | 0.0063           | 0.000                           |
| LEU3 (H)    | 5     | 3020 | 0.0000           | 0.0008           | 0.000                           |
| MET31 (H)   | 13    | 3021 | 0.0000           | 0.0021           | 0.000                           |
| MET4 (H)    | 5     | 3010 | 0.0000           | 0.0008           | 0.000                           |
| MSN2 (H)    | 17    | 3021 | 0.0000           | 0.0028           | 0.000                           |
| OPI1 (H)    | 80    | 3025 | 0.0000           | 0.0131           | 0.000                           |
| PDR3 (H)    | 17    | 3023 | 0.0000           | 0.0028           | 0.000                           |
| PHO2 (H)    | 4     | 3020 | 0.0000           | 0.0007           | 0.000                           |
| RLM1 (H)    | 53    | 3020 | 0.0000           | 0.0087           | 0.000                           |
| RLR1 (H)    | 39    | 3020 | 0.0000           | 0.0064           | 0.000                           |
| RPN4 (H)    | 38    | 3023 | 0.0000           | 0.0063           | 0.000                           |
| SIG1 (H)    | 23    | 3014 | 0.0000           | 0.0038           | 0.000                           |
| SNT2 (H)    | 26    | 3021 | 0.0000           | 0.0043           | 0.000                           |
| SPT2 (H)    | 46    | 3020 | 0.0000           | 0.0076           | 0.000                           |
| STB5 (H)    | 12    | 3021 | 0.0000           | 0.0020           | 0.000                           |
| STP1 (H)    | 4     | 3014 | 0.0000           | 0.0007           | 0.000                           |
| SUT1 (H)    | 8     | 3020 | 0.0000           | 0.0013           | 0.000                           |
| THI2 (H)    | 8     | 3014 | 0.0000           | 0.0013           | 0.000                           |
| RPN4 (M)    | 29    | 3021 | 0.0000           | 0.0048           | 0.000                           |
| PUT3 (M)    | 3     | 3021 | 0.0000           | 0.0005           | 0.000                           |
| GCR1 (M)    | 11    | 3023 | 0.0000           | 0.0018           | 0.000                           |
| HAP1 (M)    | 24    | 3020 | 0.0000           | 0.0040           | 0.000                           |
| ABF1 (M)    | 38    | 3010 | 0.0000           | 0.0063           | 0.000                           |
| YRR1 (M)    | 13    | 3020 | 0.0000           | 0.0022           | 0.000                           |
| STB5 (M)    | 12    | 3020 | 0.0000           | 0.0020           | 0.000                           |
| ROX1 (M)    | 30    | 3021 | 0.0000           | 0.0050           | 0.000                           |
| YDR520C (M) | 6     | 3021 | 0.0000           | 0.0010           | 0.000                           |

Continued on next page

| TF (Study) | Total | Prom | $M_{\text{Obs}}$ | $M_{\text{Exp}}$ | $M_{\text{Obs}}/M_{\text{Exp}}$ |
|------------|-------|------|------------------|------------------|---------------------------------|
| RLR1 (M)   | 2     | 3010 | 0.0000           | 0.0003           | 0.000                           |
| CAD1 (M)   | 11    | 3020 | 0.0000           | 0.0018           | 0.000                           |
| MIG1 (M)   | 19    | 3020 | 0.0000           | 0.0031           | 0.000                           |
| GCN4 (M)   | 39    | 3023 | 0.0000           | 0.0064           | 0.000                           |
| YAP1 (M)   | 7     | 3021 | 0.0000           | 0.0012           | 0.000                           |
| STP4 (M)   | 2     | 3007 | 0.0000           | 0.0003           | 0.000                           |
| AZF1 (M)   | 3     | 2996 | 0.0000           | 0.0005           | 0.000                           |
| MET32 (M)  | 30    | 3021 | 0.0000           | 0.0050           | 0.000                           |
| SFL1 (M)   | 19    | 3023 | 0.0000           | 0.0031           | 0.000                           |
| RAP1 (M)   | 54    | 3020 | 0.0000           | 0.0089           | 0.000                           |
