# Supplementary material for: Redundancy and the Evolution of Cis-Regulatory Element Multiplicity
Source: PubMed Central journal article supplement (PMC2900288; doi:10.1371/journal.pcbi.1000848), 2010-07-08
Supplement: pcbi.1000848.s009.pdf [file pcbi.1000848.s009.pdf]

**Table S4.** Matrix of correlations between genomic features. Values are Spearman rank correlation coefficients ( $\rho$ ). Data used for the cluster analysis in Figure 7.

|           | Len   | Nucl  | TATA  | GC    | DSB   | Div   | CO    | GR    | ER    | BR    | Essent | Dupl  | $K_a/K_s$ | DC    | Noise | mRNA |
|-----------|-------|-------|-------|-------|-------|-------|-------|-------|-------|-------|--------|-------|-----------|-------|-------|------|
| Nucl      | 0.69  |       |       |       |       |       |       |       |       |       |        |       |           |       |       |      |
| TATA      | 0.20  | 0.13  |       |       |       |       |       |       |       |       |        |       |           |       |       |      |
| GC        | 0.28  | 0.23  | 0.23  |       |       |       |       |       |       |       |        |       |           |       |       |      |
| DSB       | 0.06  | -0.03 | 0.16  | 0.37  |       |       |       |       |       |       |        |       |           |       |       |      |
| Div       | -0.02 | 0.03  | -0.13 | -0.11 | -0.27 |       |       |       |       |       |        |       |           |       |       |      |
| CO        | 0.21  | 0.13  | 0.10  | 0.15  | 0.19  | -0.13 |       |       |       |       |        |       |           |       |       |      |
| GR        | -0.19 | -0.14 | -0.27 | -0.18 | -0.11 | 0.09  | -0.08 |       |       |       |        |       |           |       |       |      |
| ER        | -0.20 | -0.07 | -0.23 | -0.12 | -0.10 | 0.11  | -0.05 | 0.29  |       |       |        |       |           |       |       |      |
| BR        | -0.09 | -0.08 | -0.14 | -0.08 | -0.02 | -0.05 | -0.06 | 0.20  | 0.13  |       |        |       |           |       |       |      |
| Ess       | -0.09 | -0.12 | -0.13 | -0.12 | -0.07 | 0.04  | -0.01 | 0.16  | 0.01  | 0.10  |        |       |           |       |       |      |
| Dupl      | 0.15  | 0.06  | 0.07  | 0.12  | 0.14  | -0.13 | 0.03  | -0.06 | -0.05 | 0.01  | -0.16  |       |           |       |       |      |
| $K_a/K_s$ | -0.09 | 0.00  | -0.14 | -0.14 | -0.17 | 0.23  | -0.08 | 0.03  | 0.22  | -0.04 | -0.14  | -0.02 |           |       |       |      |
| DC        | 0.10  | -0.06 | 0.01  | -0.00 | 0.02  | -0.09 | 0.04  | -0.02 | -0.19 | 0.07  | 0.23   | 0.10  | -0.33     |       |       |      |
| Noise     | 0.03  | 0.15  | 0.16  | 0.10  | 0.07  | 0.07  | 0.03  | -0.08 | 0.15  | -0.09 | -0.21  | 0.01  | 0.23      | -0.27 |       |      |
| mRNA      | 0.08  | -0.12 | 0.07  | 0.08  | 0.11  | -0.13 | 0.03  | -0.01 | -0.23 | 0.08  | 0.16   | 0.02  | -0.44     | 0.36  | -0.49 |      |
| Prot      | 0.06  | -0.09 | 0.07  | 0.02  | 0.06  | -0.09 | 0.04  | -0.05 | -0.30 | 0.01  | 0.17   | -0.00 | -0.45     | 0.36  | -0.46 | 0.57 |

Legend: Len, promoter length; Nucl, proportion of sequence occupied by nucleosomes; TATA box presence/absence; GC content; DSB, frequency of meiotic DSBs; Div, proportion of nucleotide differences between *S. cerevisiae* and *S. paradoxus*; CO, number of crossovers; GR, genetic robustness; ER, environmental robustness; BR, genetic background robustness; Ess, essentiality; Dupl, presence of a gene duplicate elsewhere in the genome; DC, degree centrality; Noise, protein expression noise; mRNA abundance; Prot, protein abundance. See Protocol S1 for more details.
