# Supplementary material for: Redundancy and the Evolution of Cis-Regulatory Element Multiplicity
Source: PubMed Central journal article supplement (PMC2900288; doi:10.1371/journal.pcbi.1000848), 2010-07-08
Supplement: pcbi.1000848.s010.pdf [file pcbi.1000848.s010.pdf]

**Table S5** Association between multiplicity and GO slim terms from each domain. Significance levels after correction for multiple comparisons using the Holm method: \*,  $P < 0.01$ ; \*\*,  $P < 0.001$ ; \*\*\*,  $P < 0.0001$ .

| ID                        | Description                             | Genes | Effect | (SE)   | Z      | k   |     |
|---------------------------|-----------------------------------------|-------|--------|--------|--------|-----|-----|
| <i>Cellular component</i> |                                         |       |        |        |        |     |     |
| <b>GO:0005886</b>         | <b>plasma membrane</b>                  | 281   | 0.058  | 0.0084 | 6.904  | 105 | *** |
| <b>GO:0005618</b>         | <b>cell wall</b>                        | 98    | 0.042  | 0.0066 | 6.365  | 74  | *** |
| <b>GO:0005624</b>         | <b>membrane fraction</b>                | 196   | 0.040  | 0.0069 | 5.721  | 81  | *** |
| <b>GO:0005576</b>         | <b>extracellular region</b>             | 25    | 0.029  | 0.0066 | 4.399  | 42  | **  |
| <b>GO:0016020</b>         | <b>membrane</b>                         | 1129  | 0.024  | 0.0058 | 4.082  | 128 | *   |
| GO:0005840                | ribosome                                | 338   | 0.013  | 0.0060 | 2.131  | 63  |     |
| GO:0005694                | chromosome                              | 337   | 0.010  | 0.0065 | 1.576  | 77  |     |
| GO:0005933                | cellular bud                            | 177   | 0.010  | 0.0064 | 1.541  | 64  |     |
| GO:0005815                | microtubule organizing center           | 71    | 0.010  | 0.0077 | 1.240  | 39  |     |
| GO:0005783                | endoplasmic reticulum                   | 366   | 0.006  | 0.0060 | 0.971  | 68  |     |
| GO:0005777                | peroxisome                              | 62    | 0.007  | 0.0068 | 0.957  | 24  |     |
| GO:0005773                | vacuole                                 | 208   | 0.005  | 0.0078 | 0.693  | 71  |     |
| GO:0005938                | cell cortex                             | 118   | 0.000  | 0.0061 | 0.043  | 53  |     |
| GO:0005739                | mitochondrion                           | 1051  | -0.000 | 0.0058 | -0.025 | 120 |     |
| GO:0030427                | site of polarized growth                | 221   | -0.002 | 0.0068 | -0.331 | 70  |     |
| GO:0005730                | nucleolus                               | 233   | -0.004 | 0.0100 | -0.351 | 47  |     |
| GO:0005856                | cytoskeleton                            | 207   | -0.003 | 0.0061 | -0.485 | 65  |     |
| GO:0005740                | mitochondrial envelope                  | 305   | -0.006 | 0.0062 | -1.011 | 74  |     |
| GO:0005794                | Golgi apparatus                         | 182   | -0.007 | 0.0065 | -1.121 | 48  |     |
| GO:0016023                | cytoplasmic membrane-bounded vesicle    | 104   | -0.010 | 0.0069 | -1.404 | 40  |     |
| GO:0005634                | nucleus                                 | 1868  | -0.010 | 0.0071 | -1.441 | 126 |     |
| GO:0012505                | endomembrane system                     | 322   | -0.014 | 0.0060 | -2.252 | 63  |     |
| GO:0005575                | cellular component                      | 1576  | -0.013 | 0.0059 | -2.255 | 113 |     |
| GO:0005737                | cytoplasm                               | 3443  | -0.019 | 0.0058 | -3.263 | 149 |     |
| <i>Molecular function</i> |                                         |       |        |        |        |     |     |
| <b>GO:0005215</b>         | <b>transporter activity</b>             | 368   | 0.040  | 0.0062 | 6.385  | 102 | *** |
| <b>GO:0030528</b>         | <b>transcription regulator activity</b> | 317   | 0.030  | 0.0069 | 4.328  | 88  | *   |
| <b>GO:0003677</b>         | <b>DNA binding</b>                      | 332   | 0.030  | 0.0070 | 4.246  | 81  | *   |
| GO:0016874                | ligase activity                         | 169   | 0.019  | 0.0064 | 2.959  | 64  |     |

Continued on next page

| ID                        | Description                                           | Genes | Effect | (SE)   | Z      | k   |     |
|---------------------------|-------------------------------------------------------|-------|--------|--------|--------|-----|-----|
| GO:0016829                | lyase activity                                        | 84    | 0.017  | 0.0063 | 2.735  | 52  |     |
| GO:0016491                | oxidoreductase activity                               | 267   | 0.015  | 0.0060 | 2.581  | 91  |     |
| GO:0005198                | structural molecule activity                          | 334   | 0.013  | 0.0062 | 2.089  | 65  |     |
| GO:0016779                | nucleotidyltransferase activity                       | 67    | 0.016  | 0.0079 | 2.073  | 32  |     |
| GO:0030234                | enzyme regulator activity                             | 208   | 0.012  | 0.0060 | 2.059  | 63  |     |
| GO:0003774                | motor activity                                        | 16    | 0.013  | 0.0075 | 1.724  | 16  |     |
| GO:0016740                | transferase activity                                  | 674   | 0.007  | 0.0059 | 1.188  | 104 |     |
| GO:0004386                | helicase activity                                     | 80    | 0.008  | 0.0089 | 0.943  | 24  |     |
| GO:0004721                | phosphoprotein phosphatase activity                   | 48    | 0.006  | 0.0068 | 0.935  | 31  |     |
| GO:0016853                | isomerase activity                                    | 57    | 0.004  | 0.0067 | 0.601  | 30  |     |
| GO:0008233                | peptidase activity                                    | 110   | 0.002  | 0.0063 | 0.361  | 47  |     |
| GO:0045182                | translation regulator activity                        | 9     | 0.002  | 0.0096 | 0.220  | 7   |     |
| GO:0004871                | signal transducer activity                            | 44    | 0.000  | 0.0065 | 0.036  | 37  |     |
| GO:0004672                | protein kinase activity                               | 128   | -0.001 | 0.0062 | -0.135 | 55  |     |
| GO:0008289                | lipid binding                                         | 71    | -0.006 | 0.0065 | -0.879 | 33  |     |
| GO:0003723                | RNA binding                                           | 216   | -0.009 | 0.0076 | -1.160 | 44  |     |
| GO:0016787                | hydrolase activity                                    | 784   | -0.012 | 0.0071 | -1.637 | 105 |     |
| GO:0005515                | protein binding                                       | 529   | -0.018 | 0.0060 | -3.038 | 67  |     |
| <b>GO:0003674</b>         | <b>molecular function (unknown)</b>                   | 2778  | -0.031 | 0.0060 | -5.108 | 138 | *** |
| <i>Biological process</i> |                                                       |       |        |        |        |     |     |
| <b>GO:0044262</b>         | <b>cellular carbohydrate metabolic process</b>        | 268   | 0.043  | 0.0064 | 6.770  | 94  | *** |
| <b>GO:0006091</b>         | <b>generation of precursor metabolites and energy</b> | 176   | 0.040  | 0.0076 | 5.339  | 76  | *** |
| <b>GO:0006810</b>         | <b>transport</b>                                      | 1016  | 0.024  | 0.0058 | 4.189  | 127 | *   |
| GO:0006457                | protein folding                                       | 87    | 0.020  | 0.0071 | 2.820  | 38  |     |
| GO:0006519                | cellular amino acid and derivative metabolic process  | 250   | 0.018  | 0.0067 | 2.739  | 87  |     |
| GO:0007124                | pseudohyphal growth                                   | 65    | 0.017  | 0.0063 | 2.616  | 44  |     |
| GO:0006350                | transcription                                         | 602   | 0.014  | 0.0059 | 2.428  | 89  |     |
| GO:0000746                | conjugation                                           | 116   | 0.016  | 0.0066 | 2.351  | 53  |     |
| GO:0031505                | fungal-type cell wall organization                    | 127   | 0.013  | 0.0061 | 2.182  | 62  |     |
| GO:0007033                | vacuole organization                                  | 55    | 0.012  | 0.0064 | 1.900  | 37  |     |

Continued on next page

| ID         | Description                        | Genes | Effect | (SE)   | Z      | k   |
|------------|------------------------------------|-------|--------|--------|--------|-----|
| GO:0019725 | cellular homeostasis               | 138   | 0.009  | 0.0060 | 1.482  | 60  |
| GO:0045333 | cellular respiration               | 92    | 0.011  | 0.0079 | 1.360  | 39  |
| GO:0006412 | translation                        | 376   | 0.010  | 0.0075 | 1.301  | 68  |
| GO:0044255 | cellular lipid metabolic process   | 215   | 0.008  | 0.0065 | 1.276  | 58  |
| GO:0006725 | cellular aromatic compound         | 79    | 0.005  | 0.0063 | 0.816  | 40  |
|            | metabolic process                  | 79    | 0.005  | 0.0063 | 0.816  | 40  |
| GO:0030435 | sporulation resulting in formation | 132   | 0.006  | 0.0071 | 0.792  | 45  |
|            | of a cellular spore                | 132   | 0.006  | 0.0071 | 0.792  | 45  |
| GO:0046483 | heterocycle metabolic process      | 174   | 0.004  | 0.0062 | 0.716  | 61  |
| GO:0007114 | cell budding                       | 89    | 0.004  | 0.0071 | 0.494  | 43  |
| GO:0051186 | cofactor metabolic process         | 164   | 0.003  | 0.0062 | 0.482  | 49  |
| GO:0006766 | vitamin metabolic process          | 61    | 0.002  | 0.0065 | 0.379  | 34  |
| GO:0032196 | transposition                      | 45    | 0.002  | 0.0079 | 0.263  | 22  |
| GO:0016050 | vesicle organization               | 61    | 0.002  | 0.0071 | 0.263  | 26  |
| GO:0016044 | cellular membrane organization     | 271   | 0.001  | 0.0074 | 0.075  | 67  |
| GO:0000910 | cytokinesis                        | 119   | 0.000  | 0.0062 | 0.040  | 50  |
| GO:0007165 | signal transduction                | 213   | -0.000 | 0.0060 | -0.067 | 71  |
| GO:0070271 | protein complex biogenesis         | 213   | -0.001 | 0.0062 | -0.155 | 52  |
| GO:0006950 | response to stress                 | 575   | -0.003 | 0.0081 | -0.419 | 86  |
| GO:0006259 | DNA metabolic process              | 393   | -0.005 | 0.0083 | -0.547 | 63  |
| GO:0006997 | nucleus organization               | 64    | -0.004 | 0.0067 | -0.596 | 27  |
| GO:0007031 | peroxisome organization            | 53    | -0.006 | 0.0079 | -0.729 | 21  |
| GO:0007059 | chromosome segregation             | 140   | -0.005 | 0.0064 | -0.787 | 40  |
| GO:0016070 | RNA metabolic process              | 1066  | -0.006 | 0.0071 | -0.799 | 101 |
| GO:0042254 | ribosome biogenesis                | 316   | -0.008 | 0.0092 | -0.842 | 52  |
| GO:0007049 | cell cycle                         | 532   | -0.006 | 0.0060 | -0.949 | 83  |
| GO:0042221 | response to chemical stimulus      | 416   | -0.008 | 0.0073 | -1.027 | 80  |
| GO:0007126 | meiosis                            | 152   | -0.008 | 0.0062 | -1.217 | 49  |
| GO:0032989 | cellular component morphogenesis   | 170   | -0.008 | 0.0061 | -1.289 | 55  |
| GO:0006464 | protein modification process       | 535   | -0.008 | 0.0059 | -1.369 | 89  |
| GO:0008150 | biological process                 | 2035  | -0.010 | 0.0062 | -1.563 | 130 |
| GO:0016192 | vesicle-mediated transport         | 353   | -0.013 | 0.0070 | -1.778 | 73  |
| GO:0007005 | mitochondrion organization         | 286   | -0.013 | 0.0070 | -1.814 | 53  |
| GO:0044257 | cellular protein catabolic process | 184   | -0.013 | 0.0062 | -2.143 | 48  |

Continued on next page

| ID         | Description               | Genes | Effect | (SE)   | Z      | k  |
|------------|---------------------------|-------|--------|--------|--------|----|
| GO:0007010 | cytoskeleton organization | 219   | -0.014 | 0.0061 | -2.373 | 61 |
| GO:0051276 | chromosome organization   | 382   | -0.016 | 0.0061 | -2.639 | 60 |
